# Supplementary material for: Cu(ii) inhibited the transport of tetracycline in porous media: role of complexation
Source: Royal Society of Chemistry journal article supplement (doi:10.1039/d4em00210e), 2024-01-01
Supplement: d4em00210e1.pdf [file d4em00210e1.pdf]

## Supporting Information

### **Cu(II) inhibited the transport of tetracycline in porous media: Role of complexation**

Chang Xu<sup>a, b</sup>, Bo Gong<sup>a, b\*</sup>, Shan Zhao<sup>a, b</sup>, Xiao-Min Sun<sup>c</sup>, Shu-Guang Wang<sup>a, b, d, e</sup>, Chao Song<sup>a, b\*</sup>

<sup>a</sup> *Shandong Key Laboratory of Water Pollution Control and Resource Reuse, School of Environmental Science and Engineering, Shandong University, Qingdao, Shandong, 266237, China*

<sup>b</sup> *Shandong Key Laboratory of Environmental Processes and Health, School of Environmental Science and Engineering, Shandong University, Qingdao, Shandong, 266237, China*

<sup>c</sup> *Environment Research Institute, Shandong University, Qingdao 266237, China*

<sup>d</sup> *Sino-French Research Institute for Ecology and Environment (ISFREE), School of Environmental Science and Engineering, Shandong University, Qingdao, Shandong, 266237, China*

<sup>e</sup> *WeiHai Research Institute of Industrial Technology of Shandong University, Weihai, 264209, China*

---

\* Corresponding author. Tel.: +86 532 58630936; Fax: +86 532 58630907.

*E-mail address:* songchao@sdu.edu.cn (Chao Song); bogong@sdu.edu.cn (Bo Gong)

## Figure Captions

**Fig. S1** The breakthrough curves of TC transport in saturated porous media in the presence of Cu(II) in seawater (A) and freshwater (B).

**Fig. S2** The optimized structures of (A) TC, (B-D) TC-Cu complex A, B, and C with atomic number labels.

**Fig. S3** The optimized adsorption structure of (A) Complex A ( $\text{CuHTC}^{\pm}$ ), (B) Complex B ( $\text{CuHTC}^{\pm}$ ) and (C) Complex C ( $\text{Cu}_2\text{TC}^{\pm}$ ) on  $\text{SiO}_2$  (001) surface with only weak intermolecular interactions.

**Fig. S4** The PDOS of (A) TC- $\text{SiO}_2$ , (B) Complex A- $\text{SiO}_2$ , (C) Complex B- $\text{SiO}_2$ , and (D) Complex C- $\text{SiO}_2$ .

**Table S1** Common ions and water quality parameters in seawater and freshwater.

**Table S2** The total DFT energies of TC species with different charges or spin multiplicities before complexation process.

**Table S3** The total DFT energies of TC-Cu species with different charges or spin multiplicities after complexation process.

**Table S4** The Cu-O bond distances and Mayer bond orders in TC-Cu complexes.

**Table S5** The typical intermolecular bond distances and bond population between the TC/TC-Cu complex and  $\text{SiO}_2$  (001) surface.

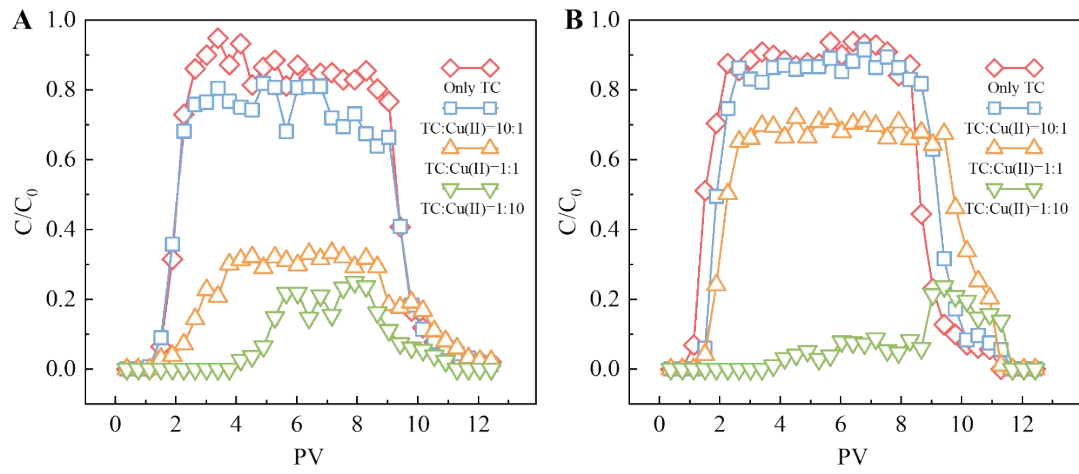

**Fig. S1** The breakthrough curves of TC transport in saturated porous media in the presence of Cu(II) in seawater (A) and freshwater (B).

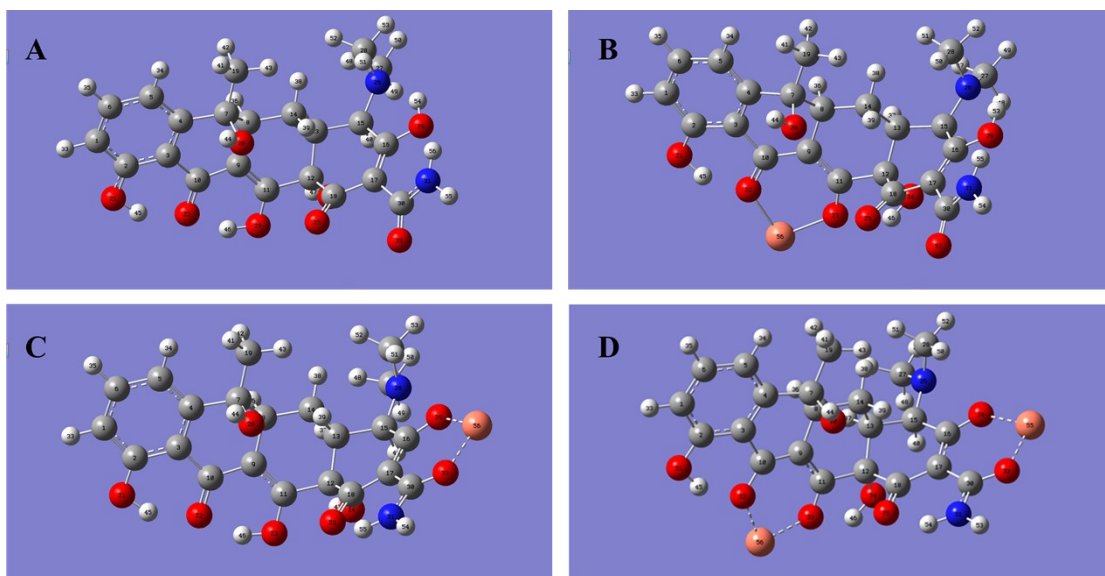

**Fig. S2** The optimized structures of (A) TC, (B-D) TC-Cu complex A, B, and C with atomic number labels.

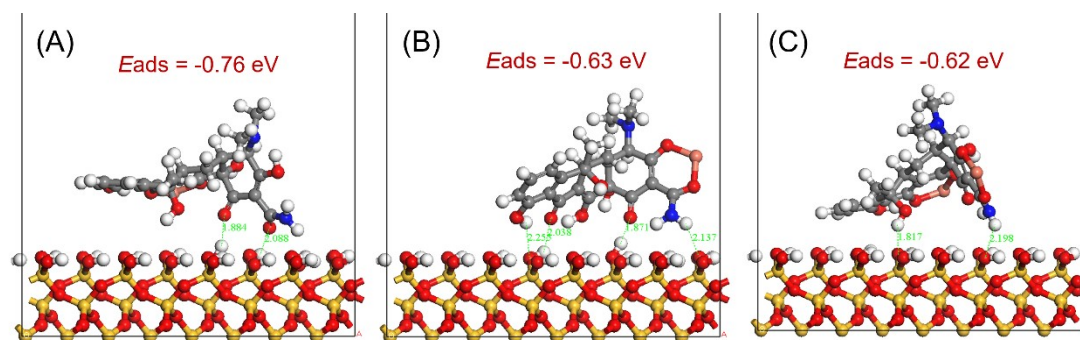

**Fig. S3** The optimized adsorption structure of (A) Complex A ( $\text{CuHTC}^\pm$ ), (B) Complex B ( $\text{CuHTC}^\pm$ ) and (C) Complex C ( $\text{Cu}_2\text{TC}^\pm$ ) on  $\text{SiO}_2$  (001) surface with only weak intermolecular interactions.

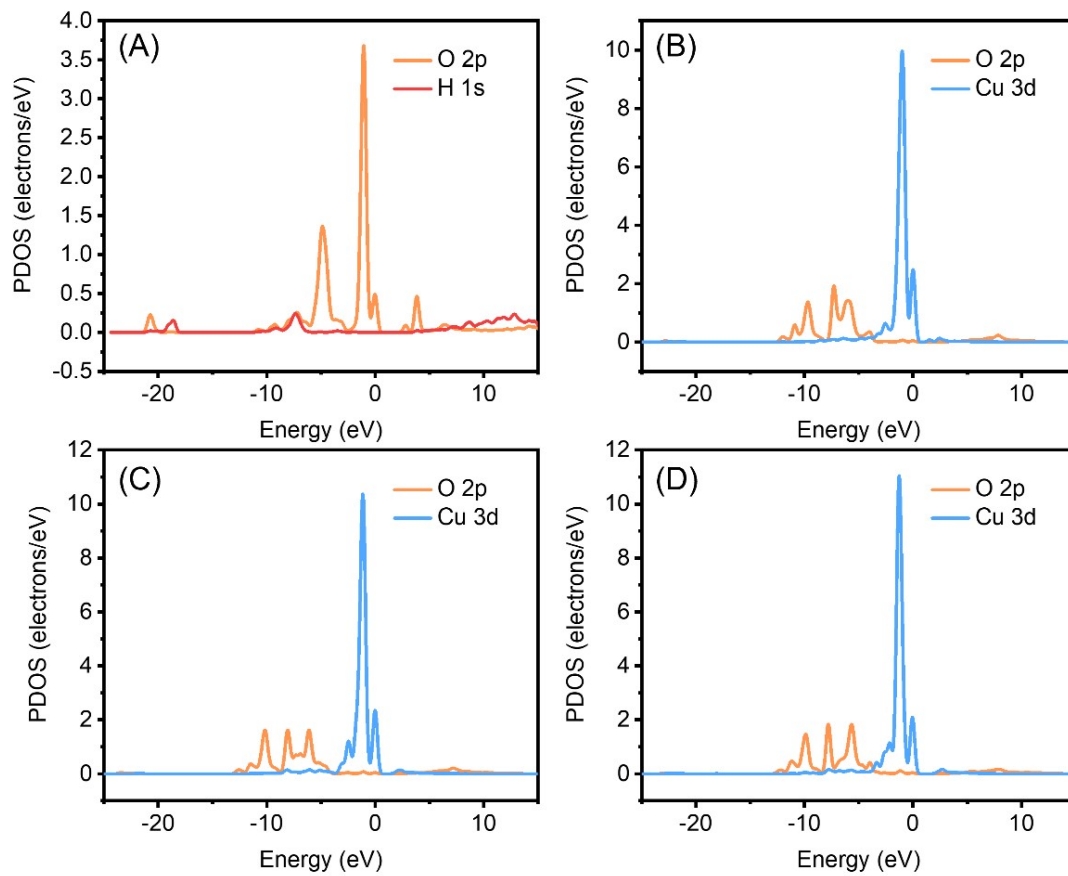

**Fig. S4** The PDOS of (A) TC-SiO<sub>2</sub>, (B) Complex A-SiO<sub>2</sub>, (C) Complex B-SiO<sub>2</sub>, and (D) Complex C-SiO<sub>2</sub>.

**Table S1** Common ions and water quality parameters in seawater and freshwater.

| <b>Test item</b>              | <b>Unit</b> | <b>Seawater</b>      | <b>Freshwater</b> |
|-------------------------------|-------------|----------------------|-------------------|
| Ca <sup>2+</sup>              | mg/L        | 438                  | 80.1              |
| Mg <sup>2+</sup>              | mg/L        | 804                  | 19.1              |
| NO <sub>3</sub> <sup>-</sup>  | mg/L        | 4.89                 | <0.004            |
| SO <sub>4</sub> <sup>2-</sup> | mg/L        | 1.88×10 <sup>3</sup> | 81.6              |
| Cl <sup>-</sup>               | mg/L        | 1.58×10 <sup>4</sup> | 104               |
| Na <sup>+</sup>               | mg/L        | 7.88×10 <sup>3</sup> | 42.6              |
| pH                            | -           | 7.86                 | 8.51              |
| TOC                           | mg/L        | 7.83                 | 10.16             |
| Conductivity                  | mS/cm       | 32.4                 | 0.67              |

**Table S2** The total DFT energies of TC species with different charges or spin multiplicities before complexation process.

| Structure            | Charge | Number of unpair electron | Spin multiplicity | Energy (Hartree) |
|----------------------|--------|---------------------------|-------------------|------------------|
| HTC <sup>±</sup> (A) | 0      | 1                         | 2                 | -1560.711        |
| HTC <sup>-</sup> (A) | -1     | 0                         | 1                 | -1560.886        |
| HTC <sup>±</sup> (B) | 0      | 1                         | 2                 | -1560.707        |
| HTC <sup>-</sup> (B) | -1     | 0                         | 1                 | -1560.892        |
| TC <sup>±</sup> (C)  | 0      | 0                         | 1                 | -1560.022        |
| TC <sup>±</sup> (C)  | 0      | 2                         | 3                 | -1560.060        |
| TC <sup>-1</sup> (C) | -1     | 1                         | 2                 | -1560.245        |
| TC <sup>-2</sup> (C) | -2     | 0                         | 1                 | -1560.412        |
| TC <sup>-2</sup> (C) | -2     | 0                         | 3                 | -1560.059        |

Blue indicates the lowest energy of TC species under this condition.



**Table S3** The total DFT energies of TC-Cu species with different charges or spin multiplicities after complexation process.

| Structure                                     | Charge | Numbers of unpair electron | spin multiplicity | Energy (Hartree) |
|-----------------------------------------------|--------|----------------------------|-------------------|------------------|
| Complex A (CuHTC <sup>+</sup> )               | 1      | 1                          | 2                 | -3200.633        |
| Complex A (CuHTC <sup>±</sup> )               | 0      | 0                          | 1                 | -3200.833        |
| Complex B (CuHTC <sup>+</sup> )               | 1      | 1                          | 2                 | -3200.651        |
| Complex B (CuHTC <sup>±</sup> )               | 0      | 0                          | 1                 | -3200.840        |
| Complex C (Cu <sub>2</sub> TC <sup>2+</sup> ) | 2      | 0                          | 1                 | -4839.888        |
| Complex C (Cu <sub>2</sub> TC <sup>2+</sup> ) | 2      | 2                          | 3                 | -4839.924        |
| Complex C (Cu <sub>2</sub> TC <sup>+</sup> )  | 1      | 1                          | 2                 | -4840.130        |
| Complex C (Cu <sub>2</sub> TC <sup>±</sup> )  | 0      | 0                          | 1                 | -4840.313        |

Blue indicates the lowest energy of the complex under this condition.

**Table S4** The Cu-O bond distances and Mayer bond orders in TC-Cu complexes.

| Structure                                    | Cu-O distance (Å) | Mayer bond order |
|----------------------------------------------|-------------------|------------------|
| Complex A (CuHTC <sup>±</sup> )              | 1.950             | 0.377            |
|                                              | 1.943             | 0.398            |
| Complex B (CuHTC <sup>±</sup> )              | 1.952             | 0.389            |
|                                              | 1.945             | 0.408            |
| Complex C (Cu <sub>2</sub> TC <sup>±</sup> ) | 1.948             | 0.380            |
|                                              | 1.942             | 0.400            |
|                                              | 1.948             | 0.396            |
|                                              | 1.942             | 0.413            |

**Table S5** The typical intermolecular bond distances and bond population between the TC/TC-Cu complex and SiO<sub>2</sub> (001) surface.

| Structure                  | Hydrogen bond |            | Cu-O         |            |
|----------------------------|---------------|------------|--------------|------------|
|                            | distance (Å)  | population | distance (Å) | population |
| TC-SiO <sub>2</sub>        | 1.569         | 0.13       | /            | /          |
|                            | 2.476         | 0.00       | /            | /          |
|                            | 2.488         | 0.01       | /            | /          |
| Complex A-SiO <sub>2</sub> | 1.648         | 0.11       |              |            |
|                            | 1.917         | 0.05       |              |            |
|                            | 2.117         | 0.02       | 2.008        | 0.09       |
|                            | 2.464         | 0.01       |              |            |
| Complex B-SiO <sub>2</sub> | /             | /          | 1.943        | 0.10       |
| Complex C-SiO <sub>2</sub> | 2.477         | 0.01       | 1.892        | 0.14       |
